1        **The landscape of mouse epididymal cells defined by the single-cell RNA-Seq**

2

3        Jianwu Shi<sup>1</sup>, Mengmeng Sang<sup>1</sup>, Gangcai Xie<sup>1\*</sup>, Hao Chen<sup>1\*</sup>

4

5        <sup>1</sup> Institute of Reproductive Medicine, Medical School of Nantong University, Nantong,

6        PR China

7

8

9

10

11

12

13        \*To whom correspondence should be addressed:

14        Institute of Reproductive Medicine, Medical School, Nantong University Qixiu Road

15        19, Nantong, China, 226001

16        Email: [chenhao@ntu.edu.cn](mailto:chenhao@ntu.edu.cn) to Hao Chen or [gangcai@ntu.edu.cn](mailto:gangcai@ntu.edu.cn) to Gangcai Xie

17

18

19 **ABSTRACT**

20 Spermatozoa acquire their fertilizing ability and forward motility properties  
21 during epididymal transit. Although lots of attempts elucidating the functions of  
22 different cell types in epididymis, the composition of epididymal tubal and cell types  
23 are still largely unknown. Using single-cell RNA sequence, we analyzed the cell  
24 constitutions and their gene expression profiles of adult epididymis derived from  
25 caput, corpus and cauda epididymis with a total of 12,597 cells. This allowed us to  
26 elucidate the full range of gene expression changes during epididymis and derive  
27 region-specific gene expression signatures along the epididymis. A total of 7 cell  
28 populations were identified with all known constituent cells of mouse epididymis, as  
29 well as two novel cell types. Our analyses revealed a segment to segment variation of  
30 the same cell type in the three different part of epididymis and generated a reference  
31 dataset of epididymal cell gene expression. Focused analyses uncovered nine subtypes  
32 of principal cell. Two subtypes of principal cell, c0.3 and c.6 respectively, in our  
33 results supported with previous finding that they mainly located in the caput of mouse  
34 epididymis and play important roles during sperm maturation. We also showed unique  
35 gene expression signatures of each cell population and key pathways that may concert  
36 epididymal epithelial cell-sperm interactions. Overall, our single-cell RNA seq  
37 datasets of epididymis provide a comprehensive potential cell types and  
38 information-rich resource for the studies of epididymal composition, epididymal  
39 microenvironment regulation by the specific cell type, or contraceptive development,  
40 as well as a gene expression roadmap to be emulated in efforts to achieve sperm  
41 maturation regulation in the epididymis.

42

43 **Key words:** Epididymis, scRNA-seq, Principal cell sub-populations

44

45

46

47

## 48 INTRODUCTION

49       The epididymis is a critical male sex organ that plays key roles in sperm  
50 transport, maturation and storage (Cooper and Yeung, 2010; Cornwall, 2009).  
51 Spermatozoa from testes acquires their motility and fertilization ability when they  
52 transit through the epididymis. In the epididymis, the sperm plasma membrane is  
53 subjected to sequential biochemical and proteomic modifications as a result of subtle  
54 interactions with components of the extracellular environment in the epididymal  
55 lumen.

56       The epididymis epithelium supports a luminal environment that promotes sperm  
57 maturation, and each region of the duct (caput, corpus, and cauda) is believed to play  
58 a unique role during sperm transition (Breton and Brown, 2013; Breton et al., 2016).  
59 The luminal secretions from caput and corpus epididymis are beneficial for the  
60 acquisition of sperm motility and fertilizing ability (Turner, 1995), cauda epididymal  
61 secretions are important for the proper storage of spermatozoa for several days in  
62 conditions that preserve their fertility (Jones and Murdoch, 1996). Each of these  
63 regions have been demonstrated to possess a distinct pattern of gene expression  
64 related to physiological functions which are important in the different steps of sperm  
65 maturation (Dube et al., 2007; Guyonnet et al., 2009; Johnston et al., 2005; Thimon et  
66 al., 2007). This compartmentalized gene expression triggers segment-specific protein  
67 secretions into the luminal fluid and, in turn, generates microenvironments optimized  
68 for each step of sperm maturation.

69           The composition of the intra luminal milieu is controlled by the surrounding  
70 pseudostratified epithelium, which is composed of five cell types, for now, possessing  
71 distinct physiological functions including principal cells, basal cells, clear/narrow  
72 cells, apical cells and halo cells all along the organ (Bernard Robaire, 2006; Cornwall,  
73 2009; Sullivan et al., 2019). Studies of region-specific epididymal proteins showed  
74 that certain cell type was able to express quite different classification of genes, which  
75 contributes to the different physiologic functions of the segments (Cornwall, 2009;  
76 Dacheux and Dacheux, 2014). With the development of single-cell RNA sequencing  
77 (scRNA-seq), numbers of organs were analyzed in mammalian (Dong et al., 2018;  
78 Han et al., 2018; Tabula Muris et al., 2018), including male and female reproductive  
79 organ such as testis (Green et al., 2018; Guo et al., 2018; Wang et al., 2018) and ovary  
80 (Fan et al., 2019; Zhang et al., 2018) but not epididymis. However, the exact cell  
81 composition and gene expression repertoire of each cell population in epididymis are  
82 less characterized.

83           In this study, we applied microfluidic based scRNA-seq to the analyses of 12,597  
84 cells derived from caput, corpus and cauda of mouse epididymis. Cell clustering  
85 analysis revealed five known cell types and more importantly discovered two novel  
86 epididymis cell sub-populations. Remarkably, nine sub-populations of principle cells  
87 were found in our study, which revealed unexpectedly heterogeneous in epididymis  
88 principle cells. Finally, our study represents the first regional transcriptome profiling  
89 of mouse epididymis at single cell level, which is important to the future study of the

90 spatial microenvironments of the epididymis, and is also important for our  
91 understanding of epididymal diseases.

92

## 93 **MATERIALS AND METHODS**

### 94 **Animals and epididymis sample collection**

95 Sample collection was carried out under license in accordance with the  
96 Guidelines for Care and Use of Laboratory Animals of China and all protocols were  
97 approved by the Institutional Review Board of Nantong University. Five  
98 eight-week-old wildtype C57Bl/6J mice were used in this study. After sacrificing the  
99 mice, the epididymis were dissected and divided into three regions (caput, corpus, and  
100 cauda) and immediately stored in the GEXSCOPE™ Tissue Preservation Solution  
101 (Singleron Biotechnologies) at 2-8 °C.

### 102 **Tissue dissociation and single cell suspension preparation**

103 Prior to tissue dissociation, the specimens were washed with Hanks Balanced  
104 Salt Solution (HBSS) for three times and minced into 1–2 mm pieces. The tissue  
105 pieces were digested in 2ml GEXSCOPE™ Tissue Dissociation Solution (Singleron  
106 Biotechnologies) at 37°C for 15min in a 15ml centrifuge tube with continuous  
107 agitation. Following digestion, a 40-micron sterile strainer (Corning) was used to  
108 separate cells from cell debris and other impurities. The cells were centrifuged at  
109 1000 rpm, 4°C, for 5 minutes and cell pellets were resuspended in 1ml PBS  
110 (HyClone). To remove red blood cells, 2 mL GEXSCOPE™ Red Blood Cell Lysis  
111 Buffer (Singleron) was added to the cell suspension and incubated at 25°C for 10  
112 minutes. The mixture was then centrifuged at 1000 rpm for 5 min and cell pellet

113 re-suspended in PBS. Cells were counted with TC20 automated cell counter  
114 (Bio-Rad).

### 115 **Single cell RNA sequencing library preparation**

116 The concentration of single-cell suspension was adjusted to  $1 \times 10^5$  cells/mL in  
117 PBS. Single cell suspension was then loaded onto a microfluidic chip (part of Singleron  
118 GEXSCOPE™ Single Cell RNAseq Kit, Singleron Biotechnologies) and single cell  
119 RNA-seq libraries were constructed according to manufacturer's instructions  
120 (Singleron Biotechnologies). The resulting single cell RNAseq libraries were  
121 sequenced on Illumina HiSeq X10 instrument with 150bp paired end reads.

### 122 **Single cell RNA-seq data analyses**

123 In general, following steps were included in the analyses: raw sequencing data  
124 preprocessing, cell barcodes extraction, reads genomic alignment, unique molecular  
125 identifier (UMI) counting, cell sub-population discovery and sub-population gene  
126 markers finding. Firstly, reads with low sequencing qualities were filtered and the  
127 sequencing adapters were trimmed by Fastp (Chen et al., 2018) software (fastp 0.19.5)  
128 using default settings. Then, umi\_tools (Smith et al., 2017) was used to identify and  
129 extract cell barcodes with the settings of cell number of 5000 and error correction  
130 threshold of 1. Next, STAR genomic mapper was applied to map the extracted reads to  
131 the mouse Gencode genome (GRCm38.primary\_assembly.genome.fa, version M18).  
132 And then, featureCounts was used to assign exon-level reads based on Gencode gene  
133 annotation (gencode.vM18.primary\_assembly.annotation.gtf, version M18).  
134 Furthermore, the UMIs for each gene were counted by umi\_tools with the editing

135 distance threshold of 1. Finally, cell sub-population discovery and sub-population  
136 markers finding were analyzed by Seurat 3.0 (Stuart et al., 2019), and only the cells  
137 with the number of feature RNAs between 500 and 6000, and the percentage of  
138 mitochondrial less than 0.5 were included for further analyses. The normalization of the  
139 expression data was performed by sctransform (SCT) algorithms  
140 (<https://github.com/ChristophH/sctransform>), and 3000 genes were selected for the  
141 integration of sub-populations from epididymis caput, corpus and cauda regions.

#### 142 **Gene enrichment and transcription factor analyses**

143 For each sub-population of epididymis or epididymal principle cells, the  
144 sub-population (or cell cluster) specific marker genes were selected for gene  
145 enrichment analyses, and the analyses were performed by clusterProfiler (Yu et al.,  
146 2012), which including gene ontology analysis. The file including 1675 mouse  
147 transcripton factors was downloaded from Riken Transcription Factor Database  
148 (<http://genome.gsc.riken.jp/TFdb/>). For each sub-population of epididymal principle  
149 cell, the average expression score was calculated based on SCT normalized expression  
150 values. The Maximal Regional Expression Difference (MRED) was defined as the  
151 difference between the maximal and the minimal expression scores among the three  
152 epididymis regions for all principle sub-populations. The 95% quantile value of the  
153 MREDs was used as the cutoff for the selection of the regional differentially expressed  
154 transcription factors.

155

156

157

158 **RESULTS**

159 **ScRNA-seq analyses revealed a novel sperm interaction epididymal**  
160 **sub-population**

161 Although quite a few studies elucidated the segment-specific function of  
162 epididymis (Belleannee et al., 2012; Sipila and Bjorkgren, 2016; Thimon et al., 2007),  
163 the comprehensive cell population of region-specific epididymal cells is still largely  
164 unknown. To define the cell types in mouse epididymis, we chose scRNA-seq to  
165 examine cells from fresh isolated caput, corpus and cauda region of the epididymis. A  
166 total of 12,597 cells from three regions of epididymis (Figure 1A and 1B) were  
167 conducted for scRNA-seq and subsequent analyses. Using Seurat analysis, we  
168 identified seven cell clusters with five known cell types in the mouse epididymis,  
169 including principal cell, clear/narrow cell, basal cell, sperm and T cells (Figure 1A  
170 and 1C, and more known marker gene expression in Figure S1).

171 Regarding the cell clusters (C1 and C5) without known epididymis marker genes  
172 expressed, we did GO enrichment or DAVID gene enrichment analyses. Based on GO  
173 enrichment analysis, C5 was identified as vascular cells, the marker genes of which  
174 are enriched with “vascular development”, “regulation of angiogenesis” and so on  
175 (Figure S2). Interestingly, we identified a novel epididymis cell types (C1), the  
176 marker genes of which were enriched with DAVID terms “secreted”, “signal peptide”,  
177 “protein digestion and absorption” et al (Figure 2B). Furthermore, Epididymis  
178 Secretory Sperm Binding Protein (Col6a1) gene was highly expressed in this novel  
179 epididymis sub-population (C1), which indicates its possible interaction with sperm



180 cells in epididymis (gene expression pattern illustrated in Figure 2A). And the highly  
181 specific expression of Olfactomedin Like 3 (Olfml3) in C1 novel cell type also  
182 revealed its possible intercellular functionalities (all top 10 C1 highly specific  
183 expressed genes can be found in Figure 2A). Interestingly, we found that the cell  
184 proportion of this novel epididymal sub-population (C1) was highest in epididymal  
185 cauda region, while lowest in caput region (Figure 2C).

186 For all the epididymis sub-populations (C0-C6), we identified population-level  
187 specifically expressed marker genes (Top 10 marker genes showed in Figure 1D, and  
188 all marker genes can be found in Table S1), which provides important marker genes  
189 for further study of epididymis sub-populations.

#### 190 **Single cell RNA-Seq analyses recapitulate principal cell sub-populations**

191 Our clustering analysis of the total epididymal cells suggested that the principal  
192 cell population is itself comprised of several sub-populations (Figure1A). To further  
193 distinguish its sub-populations, we performed clustering on principal cells (Figure  
194 3A). Nine different sub-populations of principal cell were revealed, which were  
195 defined as c0.1-c0.8 (Figure 3A). The pan-principal cell marker Aqp9 (Carvajal et al.,  
196 2018; Pastor-Soler et al., 2001) was found in all 9 clusters (Figure 3C), as expected.  
197 The enriched genes in each of these 9 principal cell were listed in the supplementary  
198 Table S2.

199 Principal cell is the major epididymal cell which composes the entire tubules and  
200 Aqp9 is the common recognized principal cell marker gene(Pastor-Soler et al., 2010).  
201 However, a comprehensive census of principal cell in the specific epididymal region

202 has been hampered by their marker gene rarity. To address these issues, we applied  
203 single cell genetic strategies and screened out top ten marker genes for each subsets of  
204 principal cell (Figure 4A). Representative marker genes for each principal cell subsets  
205 were visualized in UMAP space (Figure 4B). Consistently, the cell population c0.3  
206 and c0.6 have been reported in the previous studies (Ma et al., 2013; Xie et al., 2013),  
207 which were identified through the marker genes *Lcn5* and *Spink13* respectively  
208 (Figure 4A&B). Furthermore, the cell subset c0.3 was the most abundant cells at the  
209 caput region of epididymis with the high expressions of *Defb 15, 29* and *30* (figure  
210 5A&B). GO analysis also revealed its functional role of defense response, suggesting  
211 its predominant role in defensin family regulation (Figure 5C).

212 Apart from reported cell subsets, the seven remaining clusters represent novel  
213 populations, corresponding to extracellular structure organization(c0.0), small GTPase  
214 mediated signal transduction (c0.4), regulation of protein serine/threonine kinase  
215 activity(c0.5), epithelial cell proliferation (c0.7) and nuclear division or organelle  
216 fission(c0.8) process analyzed by GO enrichment. The represented GO terms  
217 associated with the differentially expressed genes in each cell cluster (Figure 4C)  
218 manifested diverse roles of the principal cell in regulating epididymal  
219 microenvironments, albeit three cell subsets remained unknown GO processes.

## 220 **Epididymal cell population proximal-distal distributions**

221 In the total epididymal cell study, we found spatial distribution patterns of the  
222 seven epididymal cell populations. Four cell populations (C0: Principle Cell; C3:  
223 Clear/Narrow Cells; C4: Basal Cells; C5: Sperm cells) were distally reduced, while two

224 populations (C1: Novel epididymal cell identified in this study, C2: Halo/T Cells) were  
225 distally increased (Figure 2C). Intriguingly, expressions of lots genes showed  
226 segment-specific or distally changed pattern (Bjorkgren and Sipila, 2019; Sipila and  
227 Bjorkgren, 2016), suggesting their expression patterns might be altered along with the  
228 cell number changes. The spatial distribution changes of each epididymal cell  
229 population might help to reveal their functionalities.

230 In the principle sub-population study, unexpectedly, we discovered that expression  
231 of mitochondrial genes was significantly higher in the epididymal corpus and cauda  
232 regions comparing to the caput region (Figure 3B). This observation suggests that the  
233 energy requirements in the distal epididymal regions might be stronger. For each  
234 principle sub-population, we also did cell population regional distribution studies. In  
235 total, three epididymal principle sub-populations (c0.0, c0.1, c0.4) were observed as  
236 distally increased, and six sub-populations (c0.2, c0.3, c0.5, c0.6, c0.7, c0.8) were  
237 distally decreased (Figure 3D).

238 Based on the total cell population and principle sub-population spatial distribution  
239 studies, we suggested that the different microenvironments of the three epididymal  
240 regions might be due to the cell population differences. And the epididymal  
241 proximal-distal microenvironments differences might also suggest region-dependent  
242 functionalities in mouse epididymis for sperm maturation.

#### 243 **Regional regulation patterns identified in the principle sub-populations**

244 Finally, we systematically studied the transcriptional regulations in mouse  
245 epididymal principle-cell sub-populations (Figure 6). Based on the global distribution

246 of the MREDs for the expressed genes (Figure S3), we found 459 transcription factors  
247 (TFs) were spatially differentially expressed, and the expression of 177 TFs of them  
248 was distally decreased or increased (Table S3). We found genes, such as *Enpp2* and  
249 *Bmyc*, were highly regional differentially expressed (Top 10 regional differentially  
250 expressed TFs shown in Figure 6A). *Enpp2* had been annotated as both of  
251 phosphodiesterase and phospholipase, and might be important for the catalyzing of the  
252 production of lysophosphatidic acid in extracellular fluids (*ENPP2* in *GENECARDS*).  
253 Based on TF-TF expression correlation and network study (Figure 6B, F), *Nupr1* gene  
254 was found to be highly correlated with other TFs, which indicates its important role in  
255 the principle cell regulation network. Interestingly, we found three patterns of regional  
256 expression of TFs, some TFs were both regionally and sub-population specifically  
257 expressed, such as *Nupr1* and *Pdim1* (Figure 6C), some TFs such as *Lhx1*, *Stat5b* and  
258 *Meis1* were highly specifically expressed at certain epididymal region and principle  
259 sub-population (Figure 6D), and some TFs such as *Runx2*, *Scand1* and *Mafb* (Figure  
260 6E) were highly regional expressed no matter which principle sub-population they were  
261 in. This information highlighted the complex transcriptional regulation patterns in  
262 epididymal principle sub-populations, and the regulation of which dependents on both  
263 of the epididymal location and sub-population types.

## 264 **Discussion**

265 The mammalian epididymis is composed of convoluted and interconnected  
266 regions, each of which contains a complex mosaic of spatially intermixed cells.  
267 Overwhelming studies have attempted to characterize the cell types in the epididymis

268 based on cell location, morphology, connection, function, and marker gene expression  
269 (Da Silva et al., 2011; Shum et al., 2011; Shum et al., 2014). However, there is still a  
270 lack of knowledge regarding the epididymal cell compositions and its gene regulations  
271 from caput to cauda of epididymis. So we, for the first time, profiled the single cell  
272 RNA sequencing of the whole mouse epididymis, which included 12,597 epididymal  
273 single cells from caput, corpus and cauda regions. In total, we identified six epididymal  
274 cell populations according to known marker genes or GO enrichment analysis. And  
275 interestingly, we discovered one novel epididymal cell population that cannot be  
276 identified as known cell types. This novel cell population is enriched with Epididymis  
277 Secretory Sperm Binding Protein (Col6a1) and Olfactomedin Like 3 (Olfml3), which  
278 indicates its possible interaction with sperms and might play an important role in sperm  
279 maturation. Unexpectedly, the epididymal principal cell, as the major cell type in  
280 epididymis, can be further categorized into nine sub-populations, and all of which  
281 express classical principal marker gene Aqp9 (Pastor-Soler et al., 2010). Notably, those  
282 principal sub-populations exhibit proximal-distal distribution variations in mouse  
283 epididymis, which suggests their functional divergence for sperm maturation.

284 In the past decades, emerging studies endeavored to elucidate the regulation of  
285 region-specific gene expression in the epididymis and its potential contribution for  
286 sperm maturation using various strategies including genetic regulation (Johnston et al.,  
287 2005; Oh et al., 2006; Zhang et al., 2006), small RNA (Anderson et al., 2015),  
288 epigenetic control (Sipila and Bjorkgren, 2016) and androgen-responsive regulations  
289 (Belleannee et al., 2012; Pihlajamaa et al., 2014). Region specific gene expression of

290 epididymis in the mouse and human was also studied by microarray analysis(Johnston  
291 et al., 2005; Zhang et al., 2006) . On the other hand, it was plausible that the  
292 epididymosome was contributed to the sperm modifications during the sperm transient  
293 in epididymis (Sharma et al., 2018; Trigg et al., 2019). Recently, James et al.  
294 demonstrated the expression profiles of segment-specific human epididymal epithelial  
295 cells (Browne et al., 2016). The human epididymal epithelial cells were isolated and  
296 differentiated cultured from caput, corpus and cauda and then underwent RNA-seq.  
297 However, the specific cell constitution and contribution which locate in the different  
298 region are less characterized. Our results depicted the cell landscape from each region  
299 of the adult mouse epididymis and in-depth analysis of the gene expression pattern of  
300 each cell population, suggesting more complexity roles of cell-specific regulation of  
301 epididymis besides segment-specific modulation.

302       Based on the current knowledge, the epididymal epithelium is composed of five  
303 distinct cell types: principal, narrow/clear, apical, Halo (T cell) and basal cells  
304 (Bernard Robaire, 2006; Cornwall, 2009; Sullivan et al., 2019). Supporting previous  
305 studies, we found all known cell types based on the reported cell-specific marker genes  
306 (Figure 1). In detail, Cell population C0 was defined as principal cell; cell population  
307 C2 was referred to as Halo cell; cell population C4 was corresponding to basal cell, as  
308 well as cell population C6 was identified as sperm. Cell population C3 was identified as  
309 Clear/Narrow cell due to lack specific cell markers. Intriguingly, the cell number of  
310 these known cell populations was divergent along with the different region. For  
311 example, cell population of C0, C3, C4 and C5 was gradually decreased, whereas cell

312 population of C1 and C2 was elevated from caput to cauda. Convincingly, our results of  
313 cell population C3 dramatically reduced in corpus and cauda were in line with previous  
314 study that cell/Narrow cell were exclusively in the caput region (Bernard Robaire, 2006;  
315 Breton et al., 2016).

316 Besides specific expression of Col6a1 and Olfml3, the novel epididymal cell  
317 population C1 is also significantly enriched with extracellular structure organization,  
318 extracellular matrix organization and epithelial cell proliferation. The top 10  
319 expressed genes in C1 are Clec3b, Olfml3, Col6a1, Gsn, Pcolce, Igfbp6,  
320 Serping1, C7 and Colla1. Consisting with GO analysis, all these genes were  
321 predominantly localized in the extracellular compartment according to the  
322 information from GeneCards (Stelzer G, 2016). In particularly, C-Type Lectin  
323 Domain Family 3 Member B (clec3b) was reported to control cell proliferation  
324 in clear cell renal cell carcinoma(Liu et al., 2018) as well as low clec3b in  
325 exosomes derived from HCC promoted cell migration, invasion and  
326 epithelial–mesenchymal transition(Dai et al., 2019), indicating its contribution  
327 to the maintenance of epididymal epithelium. Recent study found that Gelsolin  
328 (Gsn) was the major secreted protein in the distal region of the bovine  
329 epididymis(Belleannee et al., 2011; Dacheux and Dacheux, 2014). In line with  
330 previous finding, our results demonstrated that the number of C1 cells was  
331 elevated from caput to cauda epididymis, suggesting its potential involvement  
332 for the sperm storage. According to the GO enrichment analysis, the population of  
333 C5 cells was correspond to the regulation of vasculature development and

334 angiogenesis, which might be responsible for the communication between epididymal  
335 cells and vasculature cells the epididymis.

336 Specifically, principal cell is the most abundant cell type in the epididymal tubule,  
337 which accounts for ~80% of the epithelium(Cornwall, 2009). However, little is known  
338 about the differences of region-specific principal cell as well as the transcriptome  
339 profiling in the three regions of epididymis. Our data demonstrated for the first time  
340 the multiple cell subsets of principal cells with distinct marker genes in each  
341 sub-population. Clustering analysis focusing on the principal cells derived from caput,  
342 corpus and cauda epididymis revealed nine major cell types, two of which had been  
343 reported to be located at the caput region, and such localization is also confirmed in  
344 our study. The marker gene *Lcn5* was highly and specifically expressed in the  
345 sub-population of principal cells c0.3, which mainly located at the caput region of  
346 epididymis (Xie et al., 2013). And another marker gene *spink13* in c0.6 cell  
347 population was expressed in the principal cell of initial segment of caput and was  
348 involved in the regulation of sperm acrosome reaction (Ma et al., 2013).

349 The traditional perspective of epididymis being a well differentiated organ is not  
350 thought to have stem cell, nor its epididymal epithelial cells to divide in adult  
351 (Bernard Robaire, 2006). The epididymal epithelial cells consists of four cell types  
352 including principal cells, basal cell, clear cells and narrow cells. Recently, several  
353 studies have been investigated the possible proliferation of epididymal epithelial cells  
354 both in vitro and in mammalian animals. The isolated bovine epididymal cells were  
355 stimulated to be proliferation when co-cultured with spermatozoa(Reyes-Moreno et



356 al., 2008). Bernal-Manas et al. reported the cell proliferation of epididymal epithelium  
357 (mainly clear and principal cells) of *sus domesticus* epididymis with PCNA  
358 immunochemistry staining (Bernal-Manas et al., 2014). Another study demonstrated  
359 that the basal cells gained the capacity of proliferation after efferent duct ligation  
360 (EDL) in mice (Kim et al., 2015). The most recent studies found that the epididymal  
361 epithelia cells was able to rapidly grow after efferent duct ligation or orchidectomy.  
362 Basal cells was considered as a competitive candidate for the epididymal stem cell,  
363 albeit more convincing results need to be provided (Pinel et al., 2019). These results  
364 suggested the proliferative possibility of epididymal epithelial cells during epididymal  
365 cells dynamics. Of note, our data showed that cell subset c0.7 of principal cell was  
366 predicted as progenitor/stem cells with significantly enrichment in the epithelial cell  
367 proliferation and cell growth according to gene ontology analysis, suggesting that it  
368 might serve as stem cell or progenitor cells to keep the intact of epididymis. The  
369 proliferative cell population c0.7 from our data is comparable to previous results,  
370 although the cell source was fundamentally different. Future studies will aim to  
371 investigate whether the population c0.7 play a critical role in epididymal epithelium  
372 homeostasis and its potential stem cell capability.

373 Previous study reported the apical mitochondria-rich cells in both mouse and  
374 human epididymis These cells were believed to be distinct from principal cells and  
375 involved in the holocrine secretion and acidification of epididymal fluid  
376 (Martinez-Garcia et al., 1995). In contrast with previous studies, we surprisingly  
377 found the mitochondria percentage of principal cell was significantly increased in

378 corpus and cauda region compared to caput region of epididymis. Furthermore, one of  
379 sub-population of principal cell (c0.4) is highly enriched with the expression of  
380 mitochondria genes such as mt-Nd1, mt-Co1, mt-Nd5, mt-Nd2, mt-Cytb, mt-Nd6,  
381 mt-Nd4, mt-Rnr2, Nktr and mt-Rnr1, most of which are believed to belong to the core  
382 subunits of mitochondrial membrane respiratory chain NADH dehydrogenase  
383 (Complex I) and Cytochrome C Oxidase complex, that is essential for the  
384 maintenance of mitochondrial functions and oxidative phosphorylation. Our data  
385 suggested the apical mitochondria-rich principle cell might play more important role  
386 in the corpus/cauda than caput region of epididymis. The detailed characterizations  
387 for the c0.4 cell sub-population still need to be further elucidated.

388 Epididymal cells secret plenty of the proteins, small RNA and extracellular vesicles  
389 into the epididymal lumen to regulate sperm maturation (Bjorkgren and Sipila, 2019).  
390 DNA binding transcription factors (TFs) play center roles in the regulation of gene  
391 expression. Therefore, we further explored the differentially expressed TFs and their  
392 expression profiles. Among TFs that were abundant in the majority of principal  
393 sub-population cells, some of them are related to epididymis function in our data, such  
394 as bmyc and enpp2. The bmyc, member of the Myc family to inhibit myc, was found to  
395 be predominately expressed in the caput region (Cornwall et al., 2001) and regulated by  
396 androgen and testicular factors. Bmyc gene knockout (KO) experiment showed that the  
397 KO mice had both of smaller testes and epididymis (Turunen et al., 2012). Enpp2 was  
398 detected in the epithelial cells in rat epididymis (Belleannee et al., 2010). Besides,  
399 recent study demonstrated the expression patterns of primary cultured human

400 epididymal epithelial cells derived from caput, corpus and cauda regions (Browne et al.,  
401 2016). They reported a total of 90 differentially expressed TFs associated with  
402 epididymis epithelial cells. Compatible with previous study, expression profile of  
403 several TFs was identical such as creb3l1, tbx3, atf3 etc. However, more TFs (eg. Hlf,  
404 esr1, pou2f2, fosb and cdkn2c) displayed the inconsistent with previous results.  
405 Reasons for the inconsistency might be on account of the different of species between  
406 human and mouse. On the other hand, cultured cells may not fully epitomize the cells in  
407 the original organ because of its loss of cell communications and other hormonal  
408 regulations.

409 Taken together, our data provide an indispensable resource, at single cell  
410 resolution, for a comprehensive cell atlas of the epididymis. Combine with further  
411 studies on the detailed mechanisms of epididymal cells communications and  
412 microenvironments hemostasis for sperm maturation, it will shed light on the  
413 understanding of normal epididymis functionalities and the cellular mechanisms of  
414 epididymis diseases that cause male infertility.

#### 415 **Authors' contributions**

416 HC conceived and designed the experiments. JWS, MMS and GCX performed the  
417 experiments and analyzed the data. JWS, GCX and HC wrote the paper.

#### 418 **Funding**

419 This work was supported in part by grants from the National Key Research and  
420 Development Program of China (No. 2018YFC1003602 to HC); National Natural  
421 Science Foundation of China (81671432 and 81871202 to HC, 31900484 to GCX);

422 Natural Science Foundation of Jiangsu Province (BK20190924 to GCX) and the startup

423 R&D funding of Nantong University (03083011 to HC).

424 **Conflict of Interest**

425 The authors declare that they have no conflict of interest.

426

427

428 **Reference:**

429 Anderson, A.L., Stanger, S.J., Mihalas, B.P., Tyagi, S., Holt, J.E., McLaughlin, E.A.,  
430 and Nixon, B. (2015). Assessment of microRNA expression in mouse epididymal  
431 epithelial cells and spermatozoa by next generation sequencing. *Genom Data* 6,  
432 208-211.

433 Belleannee, C., Da Silva, N., Shum, W.W., Brown, D., and Breton, S. (2010). Role of  
434 purinergic signaling pathways in V-ATPase recruitment to apical membrane of  
435 acidifying epididymal clear cells. *Am J Physiol Cell Physiol* 298, C817-830.

436 Belleannee, C., Labas, V., Teixeira-Gomes, A.P., Gatti, J.L., Dacheux, J.L., and  
437 Dacheux, F. (2011). Identification of luminal and secreted proteins in bull epididymis. *J*  
438 *Proteomics* 74, 59-78.

439 Belleannee, C., Thimon, V., and Sullivan, R. (2012). Region-specific gene expression  
440 in the epididymis. *Cell Tissue Res* 349, 717-731.

441 Bernal-Manas, C.M., Beltran-Frutos, E., Ferrer, C., Seco-Rovira, V., Pinart, E., Briz,  
442 M.D., Bonet, S., Canteras, M., and Pastor, L.M. (2014). Cell proliferation in the  
443 seminiferous and epididymal epithelia of *Sus domesticus*. *Theriogenology* 81, 702-711.

444 Bernard Robaire, B.T.H., Marie-Claire Orgebin-Crist (2006). The Epididymis. In  
445 Knobil and Neill's Physiology of Reproduction, J.D. Neill, ed. (Elsevier), pp.  
446 1071-1148.

447 Bjorkgren, I., and Sipila, P. (2019). The impact of epididymal proteins on sperm  
448 function. *Reproduction*.

449 Breton, S., and Brown, D. (2013). Regulation of luminal acidification by the V-ATPase.  
450 *Physiology (Bethesda)* 28, 318-329.

451 Breton, S., Ruan, Y.C., Park, Y.J., and Kim, B. (2016). Regulation of epithelial  
452 function, differentiation, and remodeling in the epididymis. *Asian J Androl* 18, 3-9.

453 Browne, J.A., Yang, R., Leir, S.H., Eggener, S.E., and Harris, A. (2016). Expression  
454 profiles of human epididymis epithelial cells reveal the functional diversity of caput,  
455 corpus and cauda regions. *Mol Hum Reprod* 22, 69-82.

456 Carvajal, G., Brukman, N.G., Weigel Munoz, M., Battistone, M.A., Guazzone, V.A.,  
457 Ikawa, M., Haruhiko, M., Lustig, L., Breton, S., and Cuasnicu, P.S. (2018). Impaired  
458 male fertility and abnormal epididymal epithelium differentiation in mice lacking  
459 CRISP1 and CRISP4. *Sci Rep* 8, 17531.

460 Chen, S., Zhou, Y., Chen, Y., and Gu, J. (2018). fastp: an ultra-fast all-in-one FASTQ  
461 preprocessor. *Bioinformatics* 34, i884-i890.

- 462 Cooper, T.G., and Yeung, C.-H. (2010). Physiology of Sperm Maturation and  
463 Fertilization. In *Andrology*, pp. 61-85.
- 464 Cornwall, G.A. (2009). New insights into epididymal biology and function. *Hum*  
465 *Reprod Update* *15*, 213-227.
- 466 Cornwall, G.A., Collis, R., Xiao, Q., Hsia, N., and Hann, S.R. (2001). B-Myc, a  
467 proximal caput epididymal protein, is dependent on androgens and testicular factors for  
468 expression. *Biol Reprod* *64*, 1600-1607.
- 469 Da Silva, N., Cortez-Retamozo, V., Reinecker, H.C., Wildgruber, M., Hill, E., Brown,  
470 D., Swirski, F.K., Pittet, M.J., and Breton, S. (2011). A dense network of dendritic cells  
471 populates the murine epididymis. *Reproduction* *141*, 653-663.
- 472 Dacheux, J.L., and Dacheux, F. (2014). New insights into epididymal function in  
473 relation to sperm maturation. *Reproduction* *147*, R27-42.
- 474 Dai, W., Wang, Y., Yang, T., Wang, J., Wu, W., and Gu, J. (2019). Downregulation of  
475 exosomal CLEC3B in hepatocellular carcinoma promotes metastasis and angiogenesis  
476 via AMPK and VEGF signals. *Cell Commun Signal* *17*, 113.
- 477 Dong, J., Hu, Y., Fan, X., Wu, X., Mao, Y., Hu, B., Guo, H., Wen, L., and Tang, F.  
478 (2018). Single-cell RNA-seq analysis unveils a prevalent epithelial/mesenchymal  
479 hybrid state during mouse organogenesis. *Genome Biol* *19*, 31.
- 480 Dube, E., Chan, P.T., Hermo, L., and Cyr, D.G. (2007). Gene expression profiling and  
481 its relevance to the blood-epididymal barrier in the human epididymis. *Biol Reprod* *76*,  
482 1034-1044.
- 483 Fan, X., Bialecka, M., Moustakas, I., Lam, E., Torrens-Juaneda, V., Borggrevén, N.V.,  
484 Trouw, L., Louwe, L.A., Pilgram, G.S.K., Mei, H., *et al.* (2019). Single-cell  
485 reconstruction of follicular remodeling in the human adult ovary. *Nat Commun* *10*,  
486 3164.
- 487 Green, C.D., Ma, Q., Manske, G.L., Shami, A.N., Zheng, X., Marini, S., Moritz, L.,  
488 Sultan, C., Gurczynski, S.J., Moore, B.B., *et al.* (2018). A Comprehensive Roadmap of  
489 Murine Spermatogenesis Defined by Single-Cell RNA-Seq. *Dev Cell* *46*, 651-667  
490 e610.
- 491 Guo, J., Grow, E.J., Mlcochova, H., Maher, G.J., Lindskog, C., Nie, X., Guo, Y., Takei,  
492 Y., Yun, J., Cai, L., *et al.* (2018). The adult human testis transcriptional cell atlas. *Cell*  
493 *Res* *28*, 1141-1157.
- 494 Guyonnet, B., Marot, G., Dacheux, J.L., Mercat, M.J., Schwob, S., Jaffrezic, F., and  
495 Gatti, J.L. (2009). The adult boar testicular and epididymal transcriptomes. *BMC*  
496 *Genomics* *10*, 369.
- 497 Han, X., Wang, R., Zhou, Y., Fei, L., Sun, H., Lai, S., Saadatpour, A., Zhou, Z., Chen,  
498 H., Ye, F., *et al.* (2018). Mapping the Mouse Cell Atlas by Microwell-Seq. *Cell* *172*,  
499 1091-1107 e1017.
- 500 Johnston, D.S., Jelinsky, S.A., Bang, H.J., DiCandeloro, P., Wilson, E., Kopf, G.S., and  
501 Turner, T.T. (2005). The mouse epididymal transcriptome: transcriptional profiling of  
502 segmental gene expression in the epididymis. *Biol Reprod* *73*, 404-413.
- 503 Jones, R.C., and Murdoch, R.N. (1996). Regulation of the motility and metabolism of  
504 spermatozoa for storage in the epididymis of eutherian and marsupial mammals.  
505 *Reprod Fertil Dev* *8*, 553-568.

- 506 Kim, B., Roy, J., Shum, W.W., Da Silva, N., and Breton, S. (2015). Role of testicular  
507 luminal factors on Basal cell elongation and proliferation in the mouse epididymis. *Biol*  
508 *Reprod* 92, 9.
- 509 Liu, J., Liu, Z., Liu, Q., Li, L., Fan, X., Wen, T., and An, G. (2018). CLEC3B is  
510 downregulated and inhibits proliferation in clear cell renal cell carcinoma. *Oncol Rep*  
511 40, 2023-2035.
- 512 Ma, L., Yu, H., Ni, Z., Hu, S., Ma, W., Chu, C., Liu, Q., and Zhang, Y. (2013). Spink13,  
513 an epididymis-specific gene of the Kazal-type serine protease inhibitor (SPINK) family,  
514 is essential for the acrosomal integrity and male fertility. *J Biol Chem* 288,  
515 10154-10165.
- 516 Martinez-Garcia, F., Regadera, J., Cobo, P., Palacios, J., Paniagua, R., and Nistal, M.  
517 (1995). The apical mitochondria-rich cells of the mammalian epididymis. *Andrologia*  
518 27, 195-206.
- 519 Oh, J., Lee, J., Woo, J.M., Choi, E., Park, I., Han, C., Baek, N., Lee, H., Kim, D.H., and  
520 Cho, C. (2006). Systematic identification and integrative analysis of novel genes  
521 expressed specifically or predominantly in mouse epididymis. *BMC Genomics* 7, 314.
- 522 Pastor-Soler, N., Bagnis, C., Sabolic, I., Tyszkowski, R., McKee, M., Van Hoek, A.,  
523 Breton, S., and Brown, D. (2001). Aquaporin 9 expression along the male reproductive  
524 tract. *Biol Reprod* 65, 384-393.
- 525 Pastor-Soler, N.M., Fisher, J.S., Sharpe, R., Hill, E., Van Hoek, A., Brown, D., and  
526 Breton, S. (2010). Aquaporin 9 expression in the developing rat epididymis is  
527 modulated by steroid hormones. *Reproduction* 139, 613-621.
- 528 Pihlajamaa, P., Sahu, B., Lyly, L., Aittomaki, V., Hautaniemi, S., and Janne, O.A.  
529 (2014). Tissue-specific pioneer factors associate with androgen receptor cistromes and  
530 transcription programs. *EMBO J* 33, 312-326.
- 531 Pinel, L., Mandon, M., and Cyr, D.G. (2019). Tissue regeneration and the epididymal  
532 stem cell. *Andrology* 7, 618-630.
- 533 Reyes-Moreno, C., Laflamme, J., Frenette, G., Sirard, M.A., and Sullivan, R. (2008).  
534 Spermatozoa modulate epididymal cell proliferation and protein secretion in vitro. *Mol*  
535 *Reprod Dev* 75, 512-520.
- 536 Sharma, U., Sun, F., Conine, C.C., Reichholf, B., Kukreja, S., Herzog, V.A., Ameres,  
537 S.L., and Rando, O.J. (2018). Small RNAs Are Trafficked from the Epididymis to  
538 Developing Mammalian Sperm. *Dev Cell* 46, 481-494 e486.
- 539 Shum, W.W., Ruan, Y.C., Da Silva, N., and Breton, S. (2011). Establishment of  
540 cell-cell cross talk in the epididymis: control of luminal acidification. *J Androl* 32,  
541 576-586.
- 542 Shum, W.W., Smith, T.B., Cortez-Retamozo, V., Grigoryeva, L.S., Roy, J.W., Hill, E.,  
543 Pittet, M.J., Breton, S., and Da Silva, N. (2014). Epithelial basal cells are distinct from  
544 dendritic cells and macrophages in the mouse epididymis. *Biol Reprod* 90, 90.
- 545 Sipila, P., and Bjorkgren, I. (2016). Segment-specific regulation of epididymal gene  
546 expression. *Reproduction* 152, R91-99.
- 547 Smith, T., Heger, A., and Sudbery, I. (2017). UMI-tools: modeling sequencing errors in  
548 Unique Molecular Identifiers to improve quantification accuracy. *Genome Res* 27,  
549 491-499.



550 Stelzer G, R.R., Plaschkes I, Zimmerman S, Twik M, Fishilevich S, Iny Stein T, Nudel  
551 R, Lieder I, Mazor Y, Kaplan S, Dahary D, Warshawsky D, Guan - Golan Y, Kohn A,  
552 Rappaport N, Safran M, and Lancet D. (2016). The GeneCards Suite: From Gene Data  
553 Mining to Disease Genome Sequence Analysis ( Current Protocols in Bioinformatics),  
554 pp. 1.30.31-31.30.33.

555 Stuart, T., Butler, A., Hoffman, P., Hafemeister, C., Papalexi, E., Mauck, W.M., 3rd,  
556 Hao, Y., Stoeckius, M., Smibert, P., and Satija, R. (2019). Comprehensive Integration  
557 of Single-Cell Data. *Cell* 177, 1888-1902 e1821.

558 Sullivan, R., Legare, C., Lamontagne-Proulx, J., Breton, S., and Soulet, D. (2019).  
559 Revisiting structure/functions of the human epididymis. *Andrology* 7, 748-757.

560 Tabula Muris, C., Overall, c., Logistical, c., Organ, c., processing, Library, p.,  
561 sequencing, Computational data, a., Cell type, a., Writing, g., *et al.* (2018). Single-cell  
562 transcriptomics of 20 mouse organs creates a Tabula Muris. *Nature* 562, 367-372.

563 Thimon, V., Koukoui, O., Calvo, E., and Sullivan, R. (2007). Region-specific gene  
564 expression profiling along the human epididymis. *Mol Hum Reprod* 13, 691-704.

565 Trigg, N.A., Eamens, A.L., and Nixon, B. (2019). The contribution of epididymosomes  
566 to the sperm small RNA profile. *Reproduction*.

567 Turner, T.T. (1995). On the epididymis and its role in the development of the fertile  
568 ejaculate. *J Androl* 16, 292-298.

569 Turunen, H.T., Sipila, P., Strauss, L., Bjorkgren, I., Huhtaniemi, I., and Poutanen, M.  
570 (2012). Loss of Bmyc results in increased apoptosis associated with upregulation of  
571 Myc expression in juvenile murine testis. *Reproduction* 144, 495-503.

572 Wang, M., Liu, X., Chang, G., Chen, Y., An, G., Yan, L., Gao, S., Xu, Y., Cui, Y.,  
573 Dong, J., *et al.* (2018). Single-Cell RNA Sequencing Analysis Reveals Sequential Cell  
574 Fate Transition during Human Spermatogenesis. *Cell Stem Cell* 23, 599-614 e594.

575 Xie, S., Xu, J., Ma, W., Liu, Q., Han, J., Yao, G., Huang, X., and Zhang, Y. (2013).  
576 Lcn5 promoter directs the region-specific expression of cre recombinase in caput  
577 epididymidis of transgenic mice. *Biol Reprod* 88, 71.

578 Yu, G., Wang, L.G., Han, Y., and He, Q.Y. (2012). clusterProfiler: an R package for  
579 comparing biological themes among gene clusters. *OMICS* 16, 284-287.

580 Zhang, J.S., Liu, Q., Li, Y.M., Hall, S.H., French, F.S., and Zhang, Y.L. (2006).  
581 Genome-wide profiling of segmental-regulated transcriptomes in human epididymis  
582 using oligo microarray. *Mol Cell Endocrinol* 250, 169-177.

583 Zhang, Y., Yan, Z., Qin, Q., Nisenblat, V., Chang, H.M., Yu, Y., Wang, T., Lu, C.,  
584 Yang, M., Yang, S., *et al.* (2018). Transcriptome Landscape of Human Folliculogenesis  
585 Reveals Oocyte and Granulosa Cell Interactions. *Mol Cell* 72, 1021-1034 e1024.

586  
587  
588  
589  
590  
591  
592  
593

594 **Figure Legend**

595

596 **Figure 1. Single cell RNA sequencing of mouse epididymis regions.** (A) Seven  
597 epididymis cell populations identified. Left: UMAP of the cell clustering based on all  
598 cells. Right: UMAP of the cell clustering based on cells from each epididymis  
599 region.(B) Number of single cells identified in each region.(C) Cell populations with  
600 known marker genes. (D) Top 10 marker genes for each cell population.

601

602 **Figure 2: Study of the novel epididymis sub-population C1.** (A) Specific  
603 expression of C1 sub-population marker genes. (B) Dotplot representation of DAVID  
604 enriched terms (DAVID terms selected based on  $FDR < 10^{-5}$ ). (C) Increasing of  
605 C1 sub-population in the epididymal distal regions. The spatial proportion of each  
606 sub-population is also illustrated here.

607

608 **Figure 3. Sub-populations of principle cells identified.** (A) UMAP representation  
609 of the sub-populations. Left: All single cells identified in principle cells (C0). Right:  
610 Split by epididymis regions. (B) Higher expression of mitochondrial genes in corpus  
611 and cauda. Only principle cells were included in this comparison. (C) Principle cell  
612 marker Aqp9 expression in each sub-population. (D) Patterns Of epididymis  
613 sub-population spatial distributions.

614

615 **Figure 4. Features of principle cell sub-populations.** (A) Heatmap showing top 10  
616 marker genes for each sub-population. (B) UMAP showing representative marker  
617 genes for the principle sub-populations. (C) GO enrichment analysis for each  
618 sub-population.

619

620 **Figure 5. Study of principle cell c0.3 sub-population.** (A) c0.3 epididymis  
621 sub-population is enriched in the caput region of epididymis. Y-axis: proportion of  
622 cells from c0.3 (total: cells in principle cell population) in each region. (B) Specific  
623 expression of Defensin genes in c0.3 principle sub-population. (C) GO enrichment  
624 analysis for the marker genes in c0.3 principle sub-population. Genes related to  
625 “Defense response to bacterium” are significantly enriched.

626

627 **Figure 6. Regional regulation patterns in epididymal principle sub-populations.**  
628 (A) Top 10 regional differentially expressed transcription factors (TFs) for each  
629 principle sub-population. (B) Heatmap representation of the correlation matrix for the  
630 regional differentially expressed TFs. Spearman’s *rho* was used for correlation  
631 calculation. (C) Examples of TFs with high regional and sub-population expression  
632 variations. (D) Examples of TFs with high specificities of regional and sub-population  
633 expression. (E) Examples of TFs specifically expressed in one epididymal region. (F)  
634 TF-TF correlation network showing the network of Nupr1.

635

636 **Figure S1. Expression of known marker genes.** Marker genes from six known  
637 epididymis cell types were illustrated in UMAP plot.



638

639 **Figure S2. GO enrichment analysis for epididymis C5 cell population.** GO terms  
640 related to vascular were enriched.

641

642 **Figure S3. Density plot of MREDs of all expressed genes.** 95% quantile value is  
643 highlighted by green dash line.

644

A

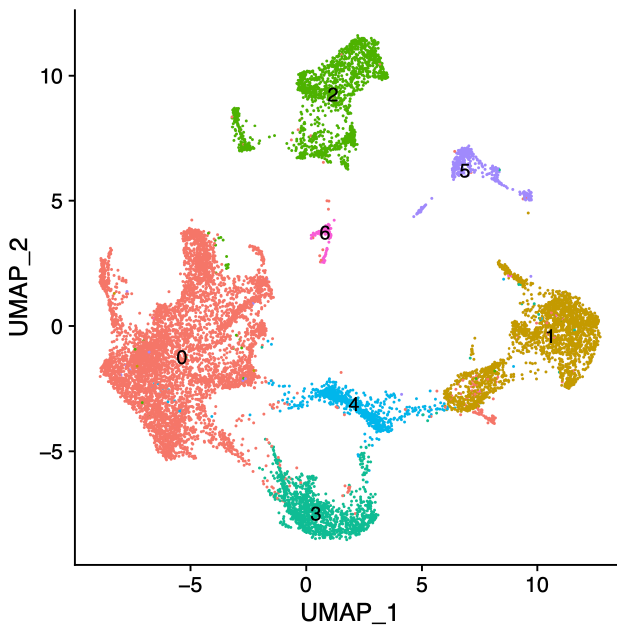

B

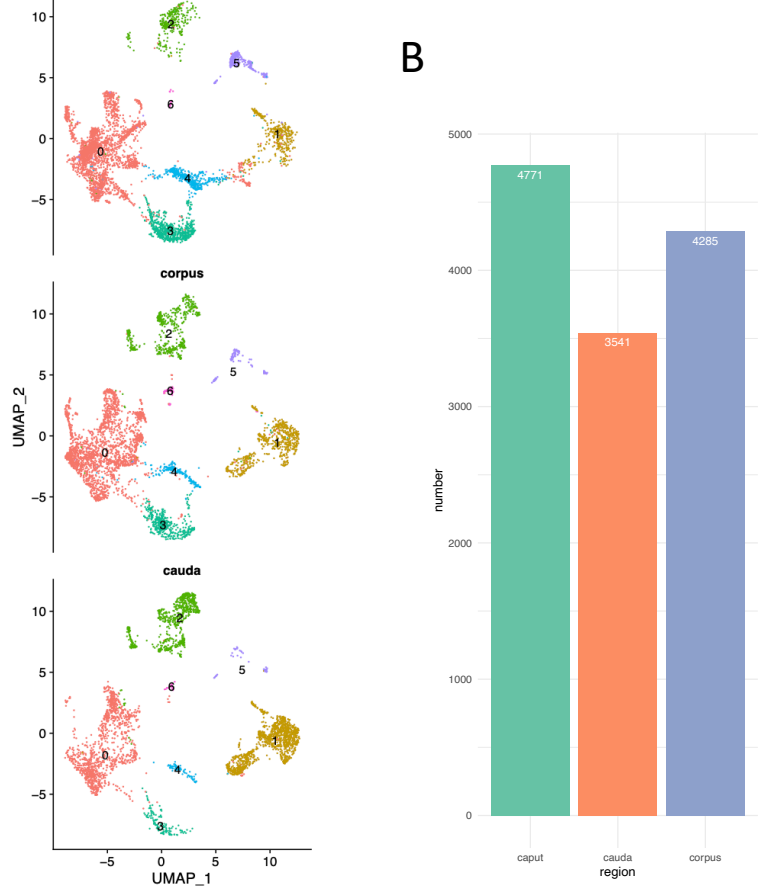

C

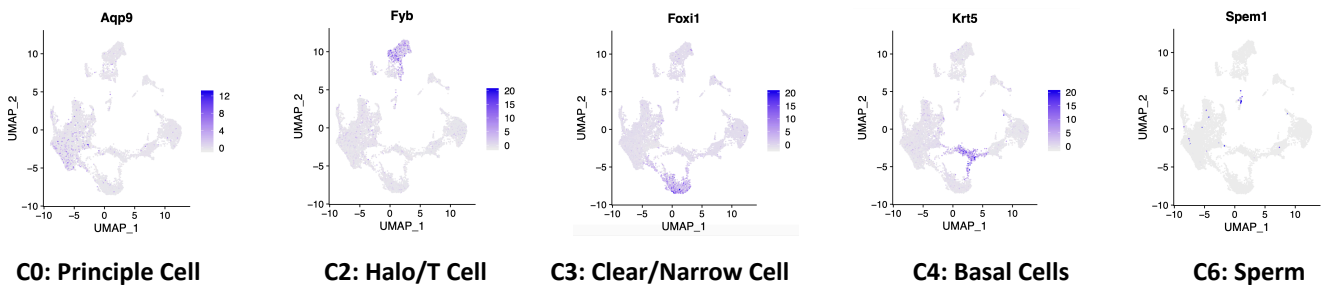

D

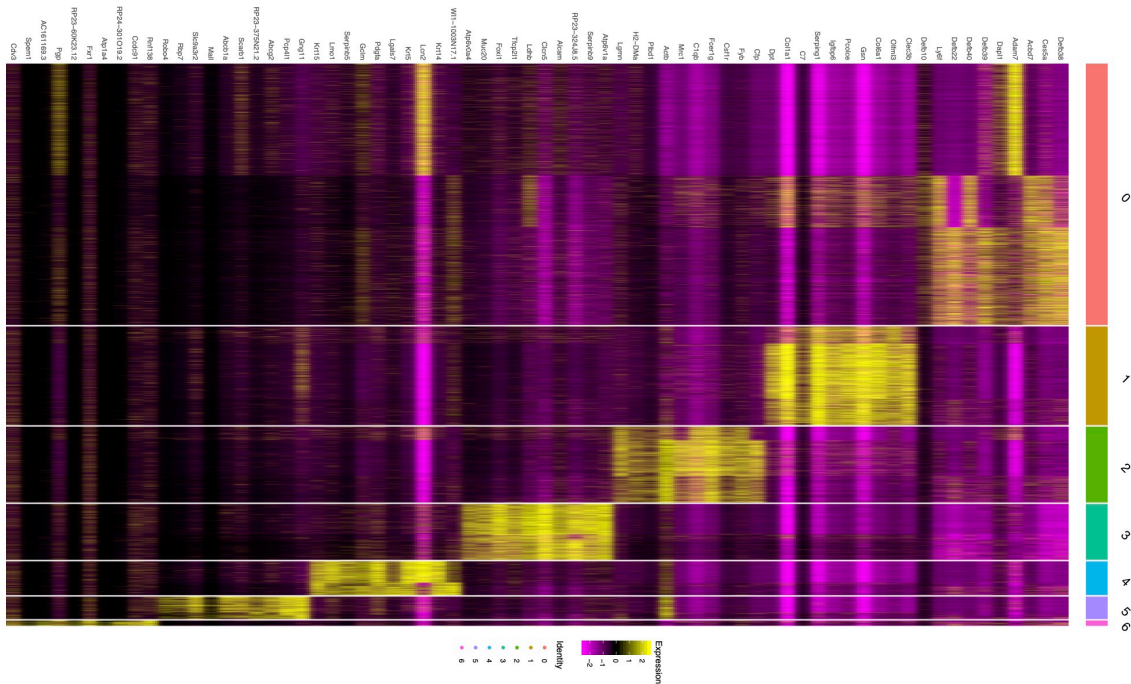

Figure 1

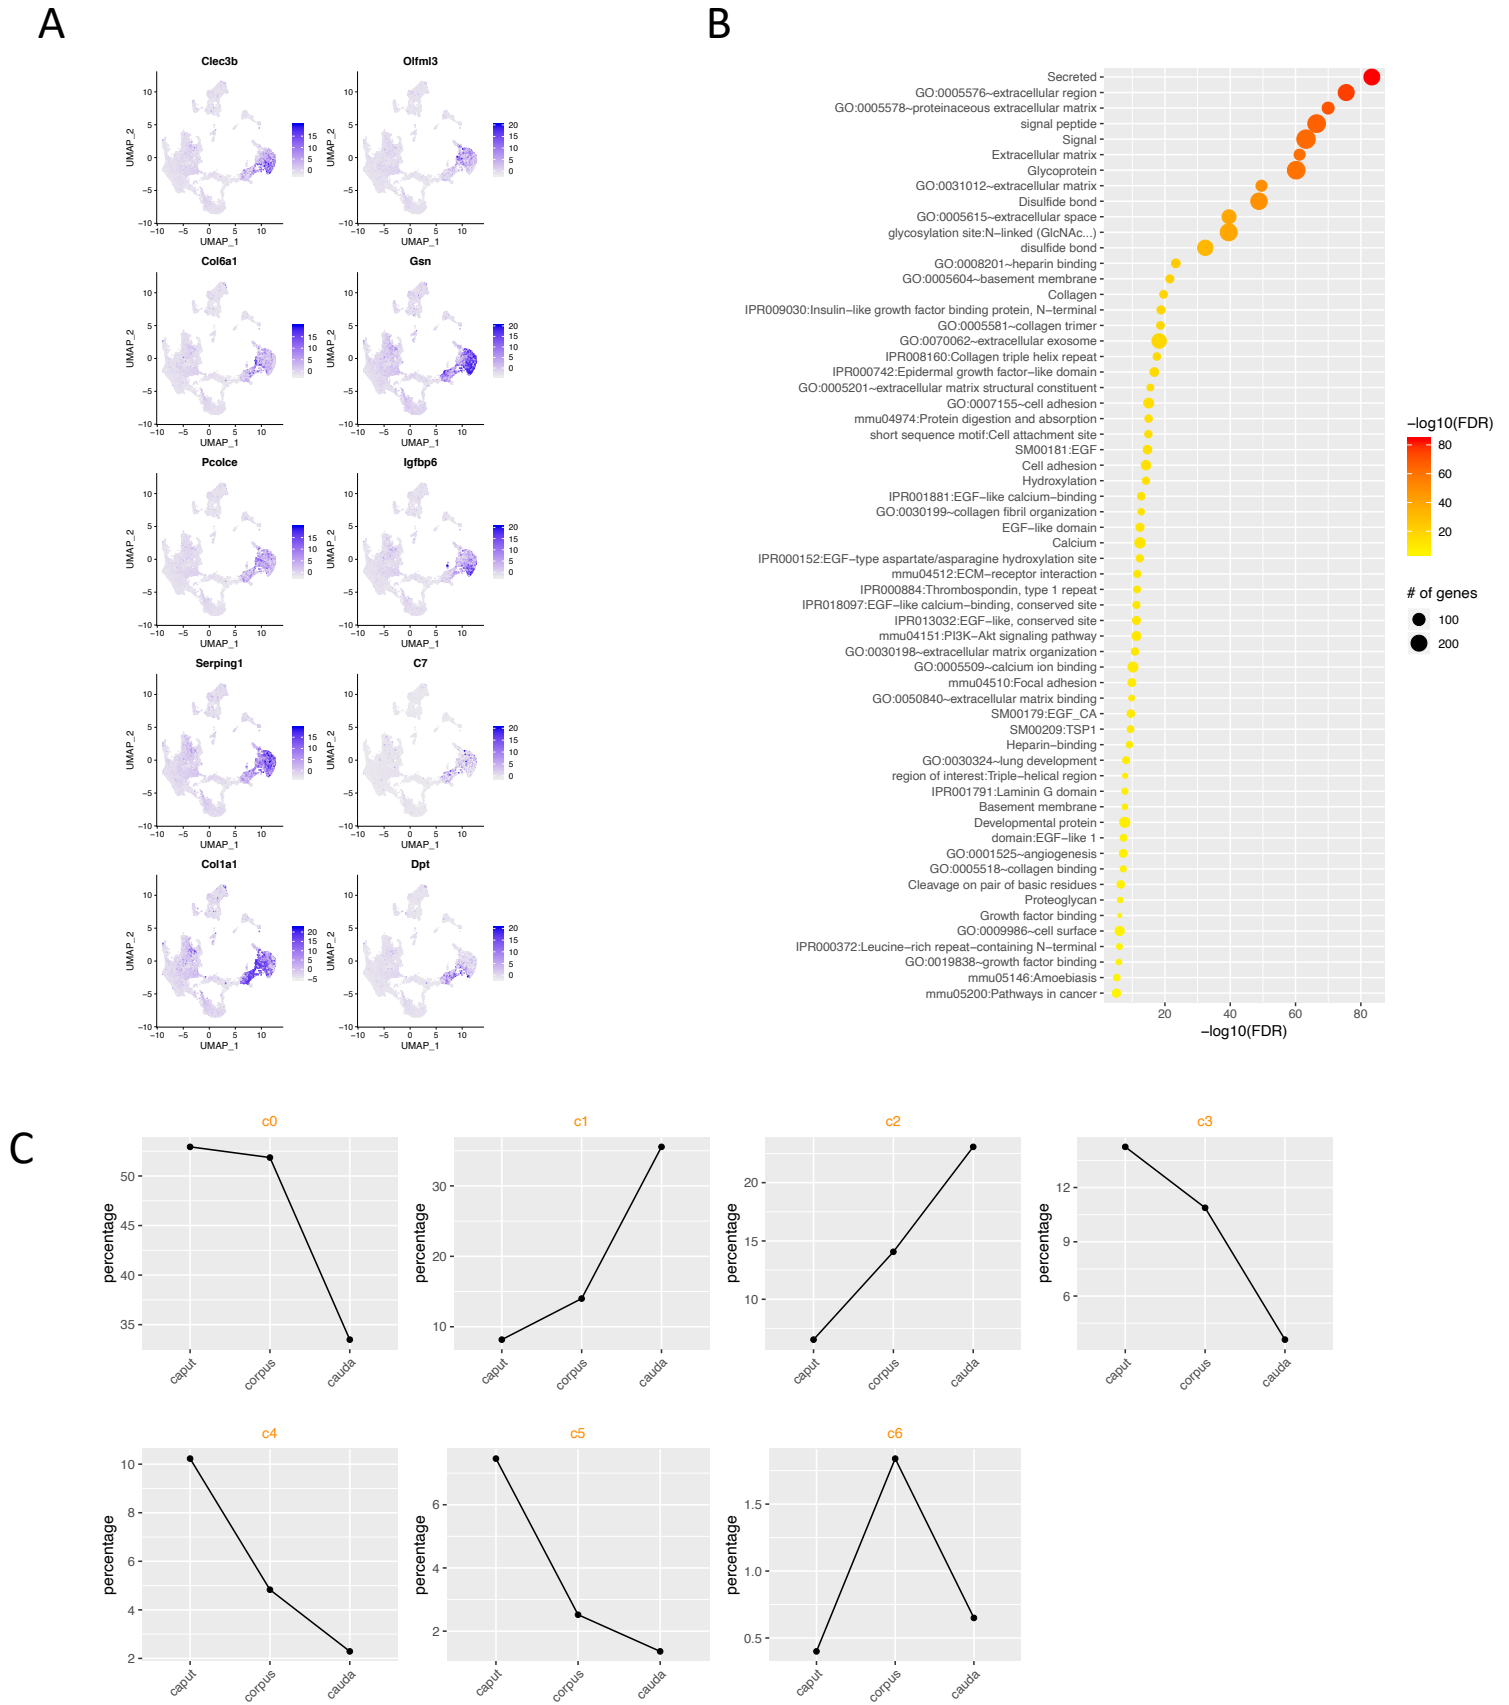

**Figure 2**

A

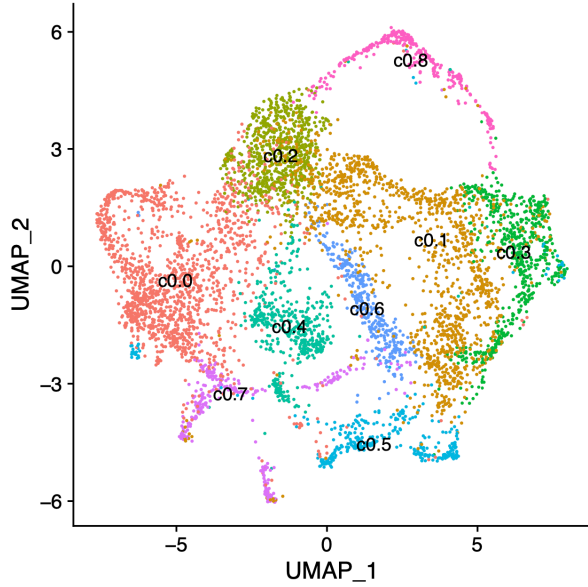

B

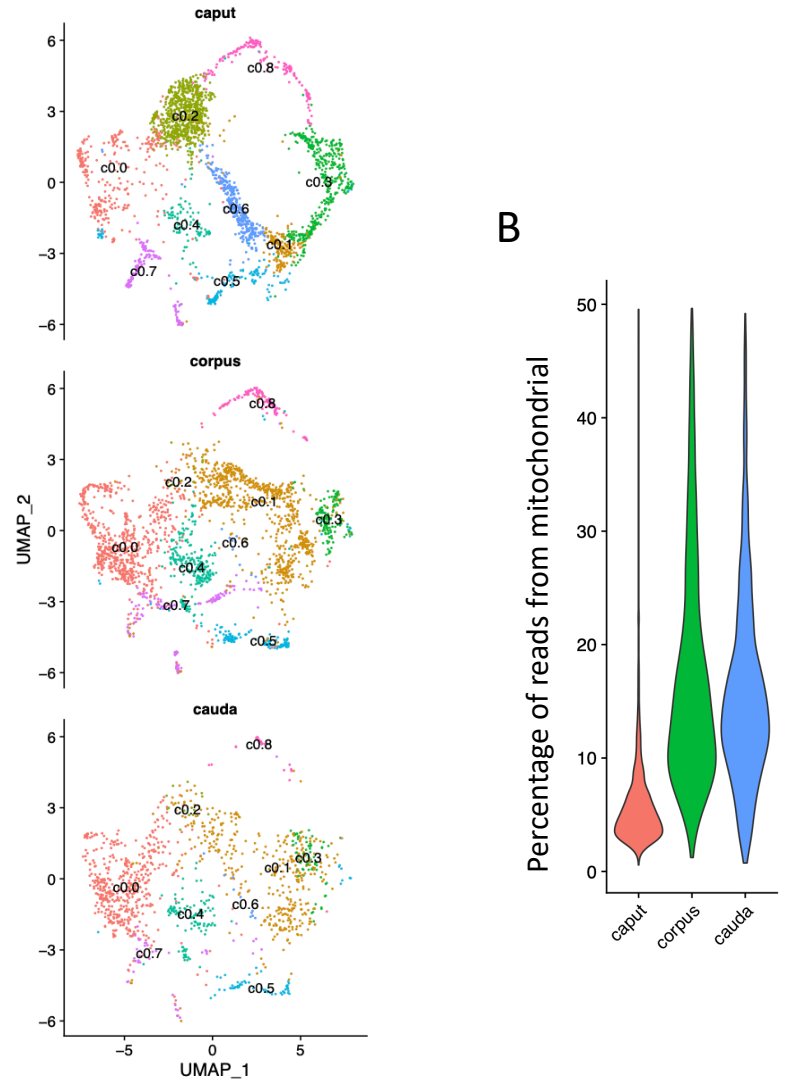

C

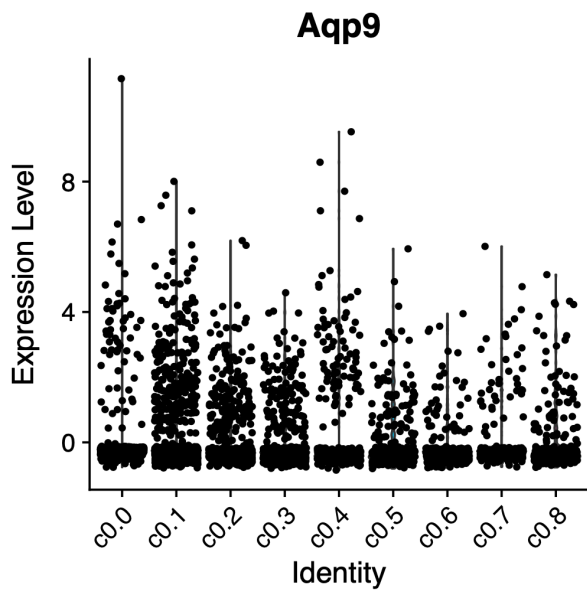

D

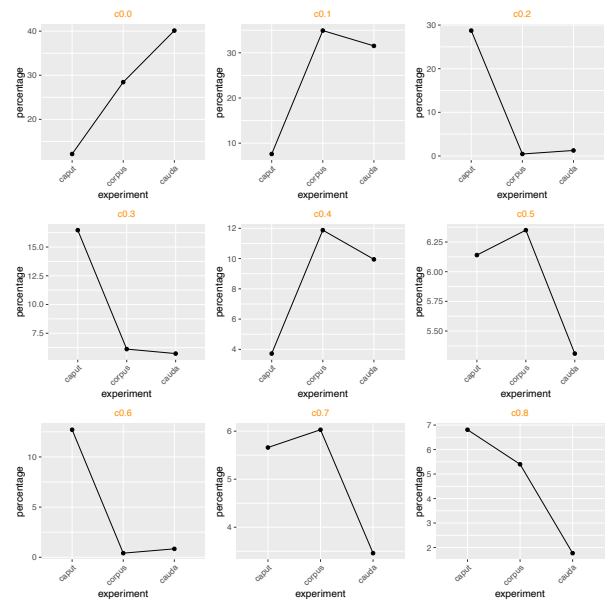

Figure 3

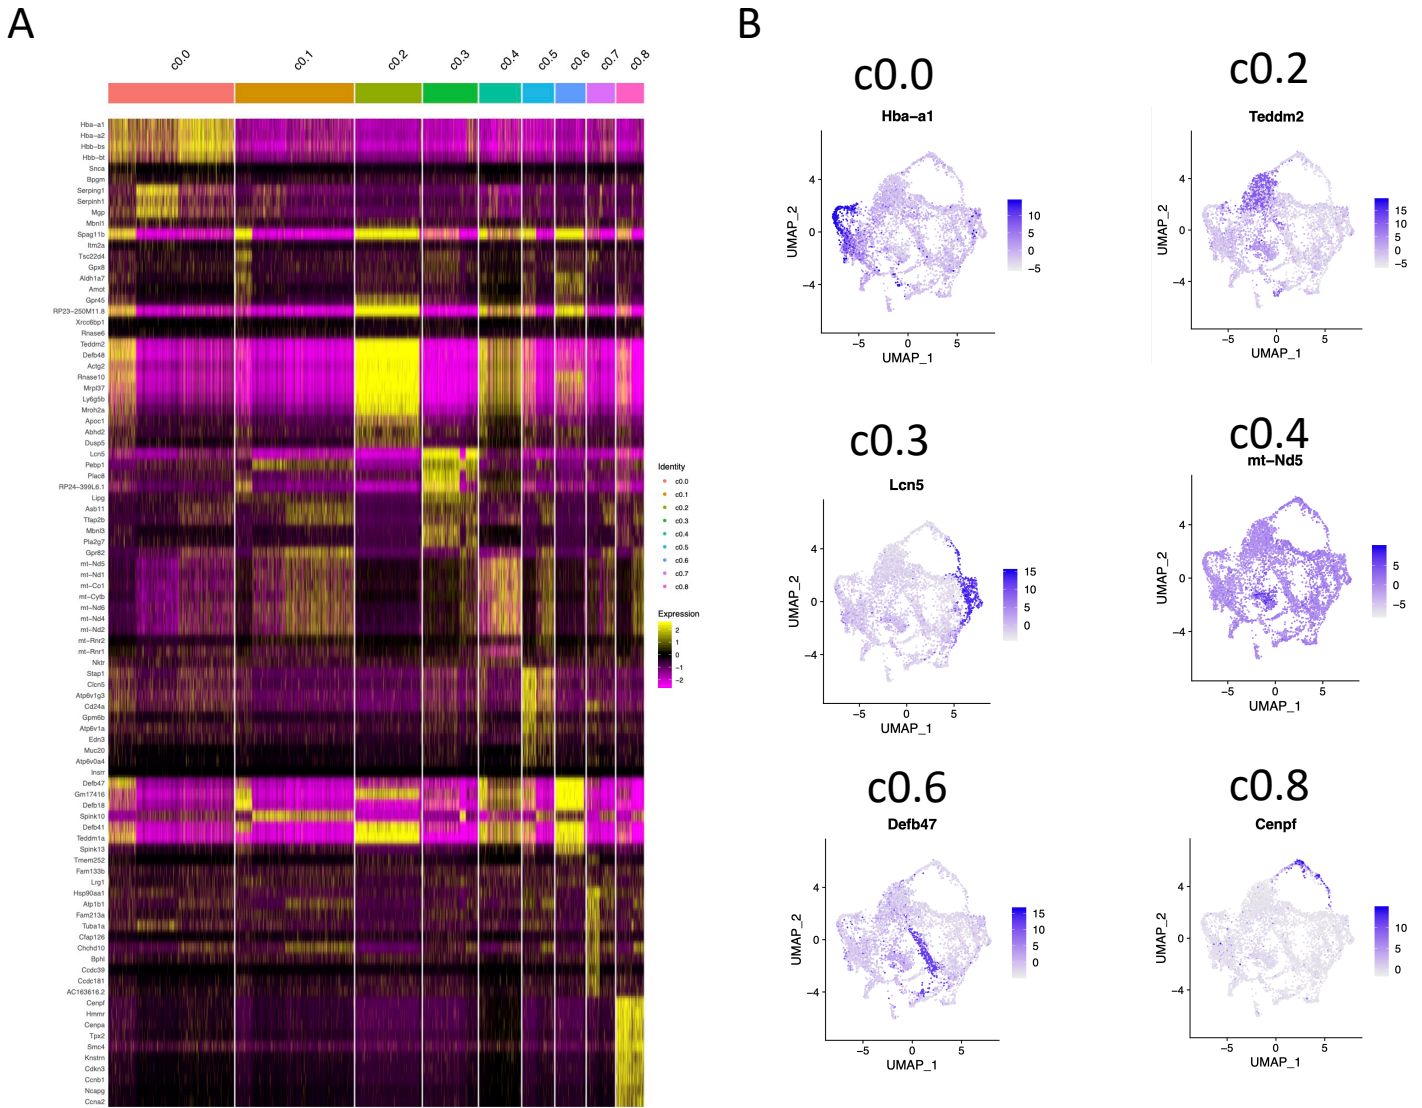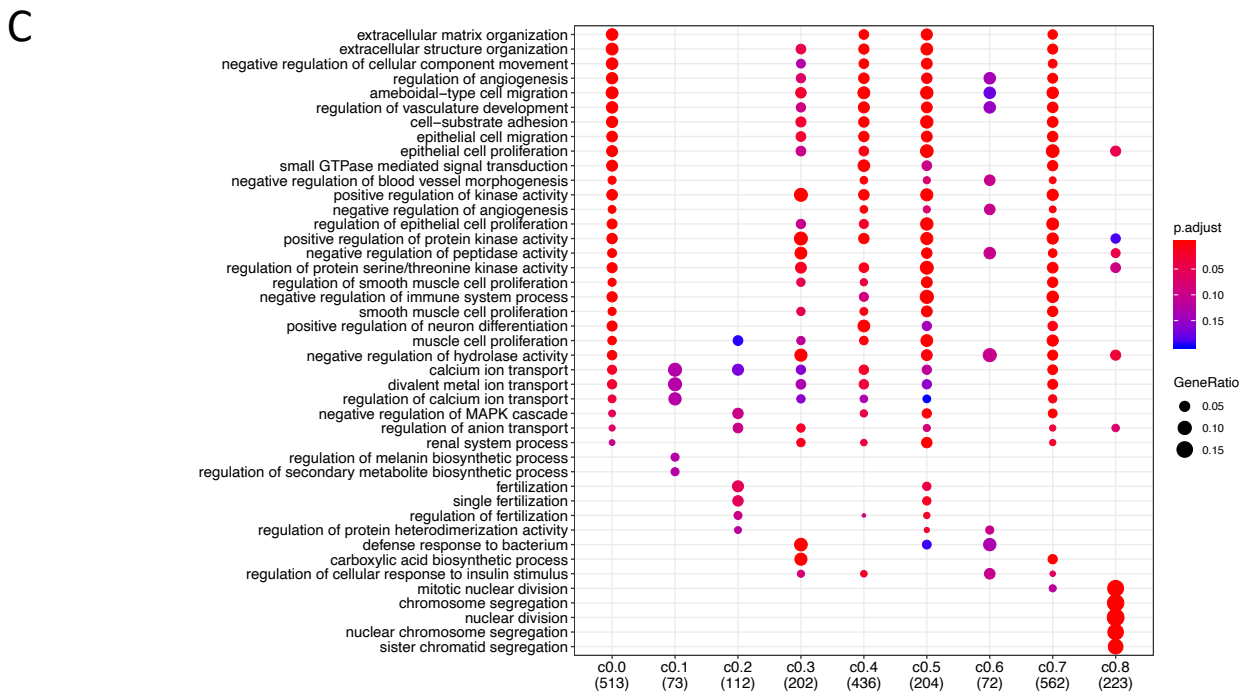

**Figure 4**



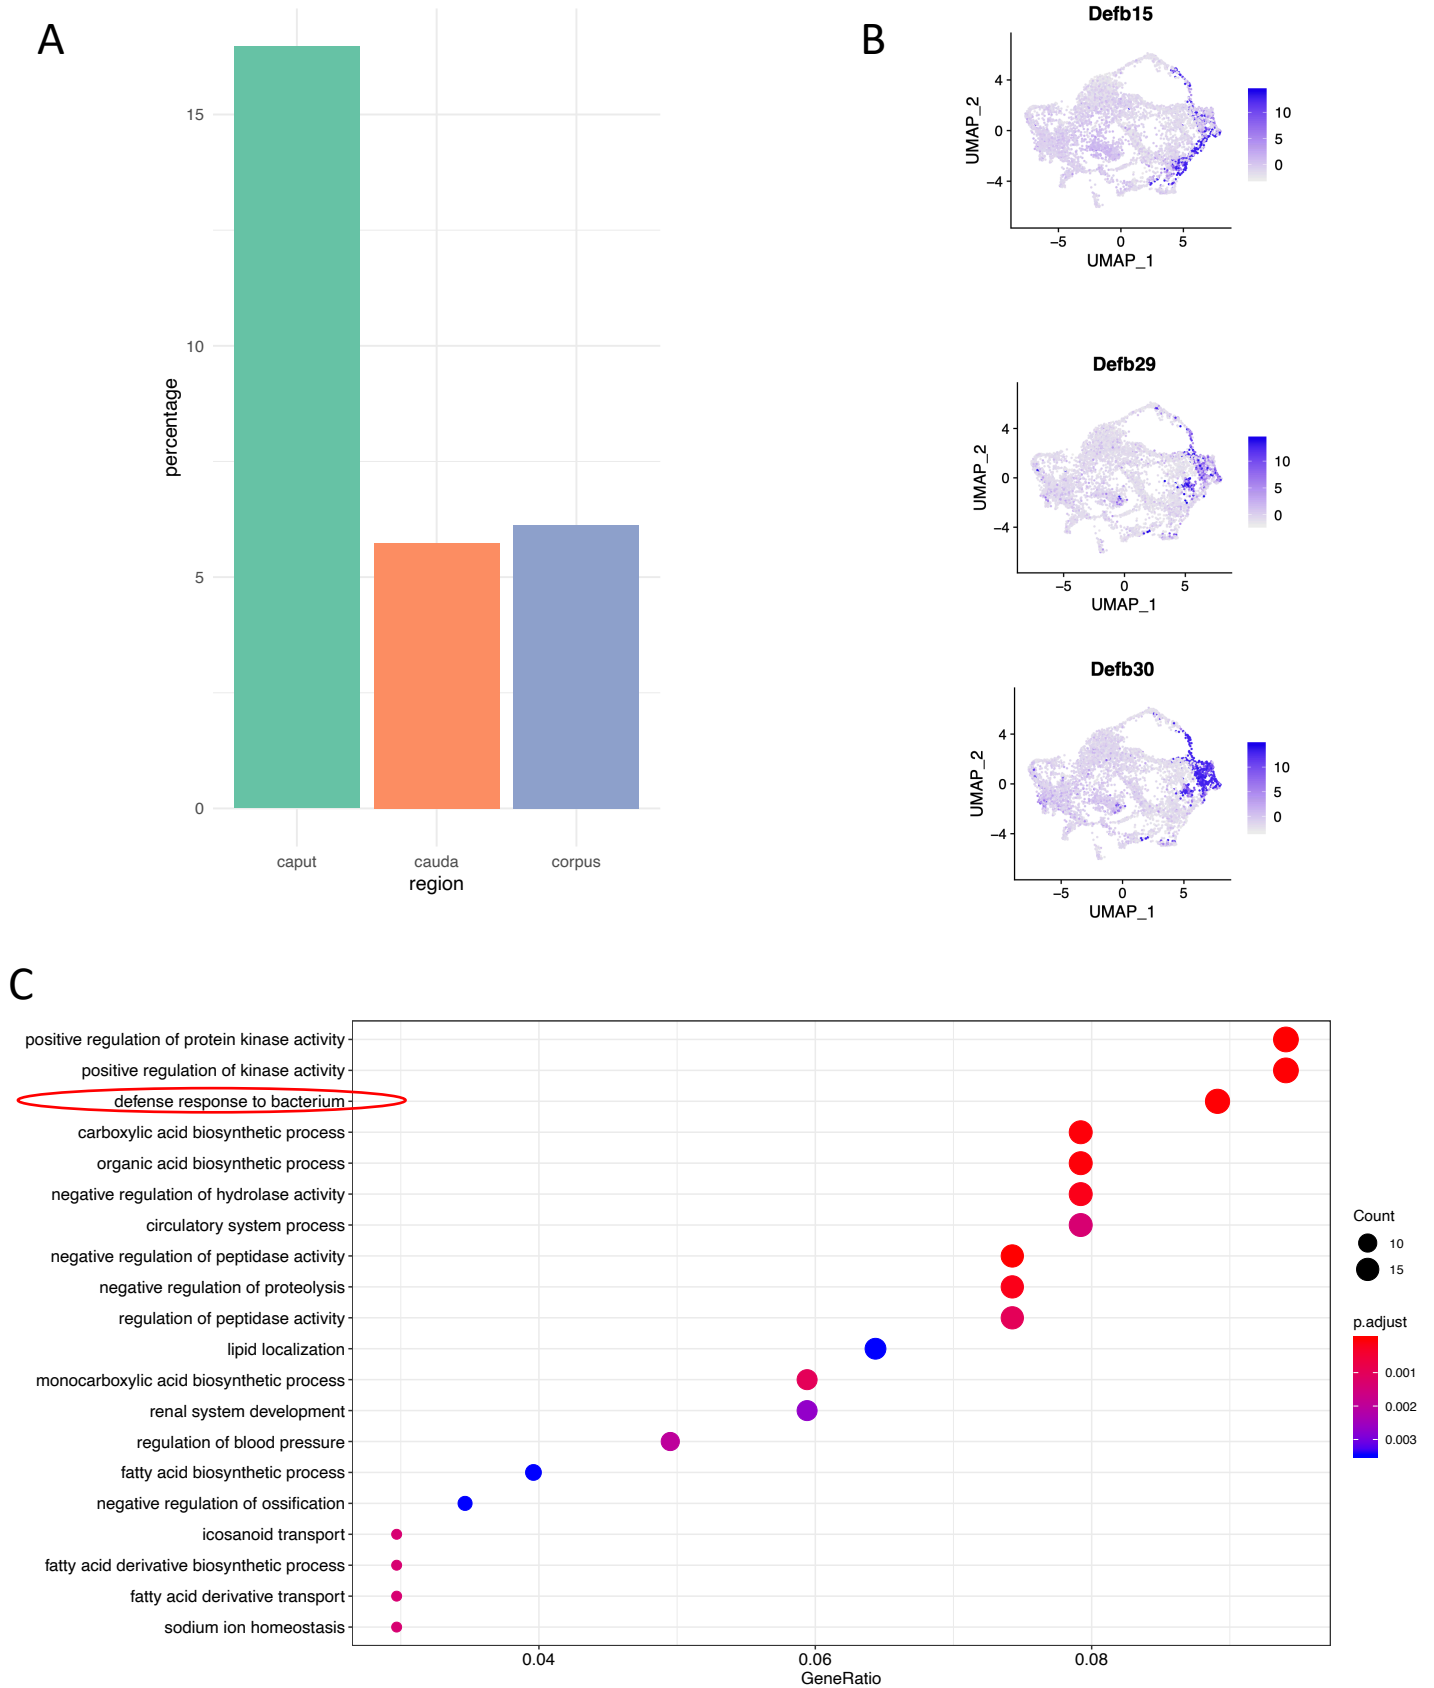

**Figure 5**

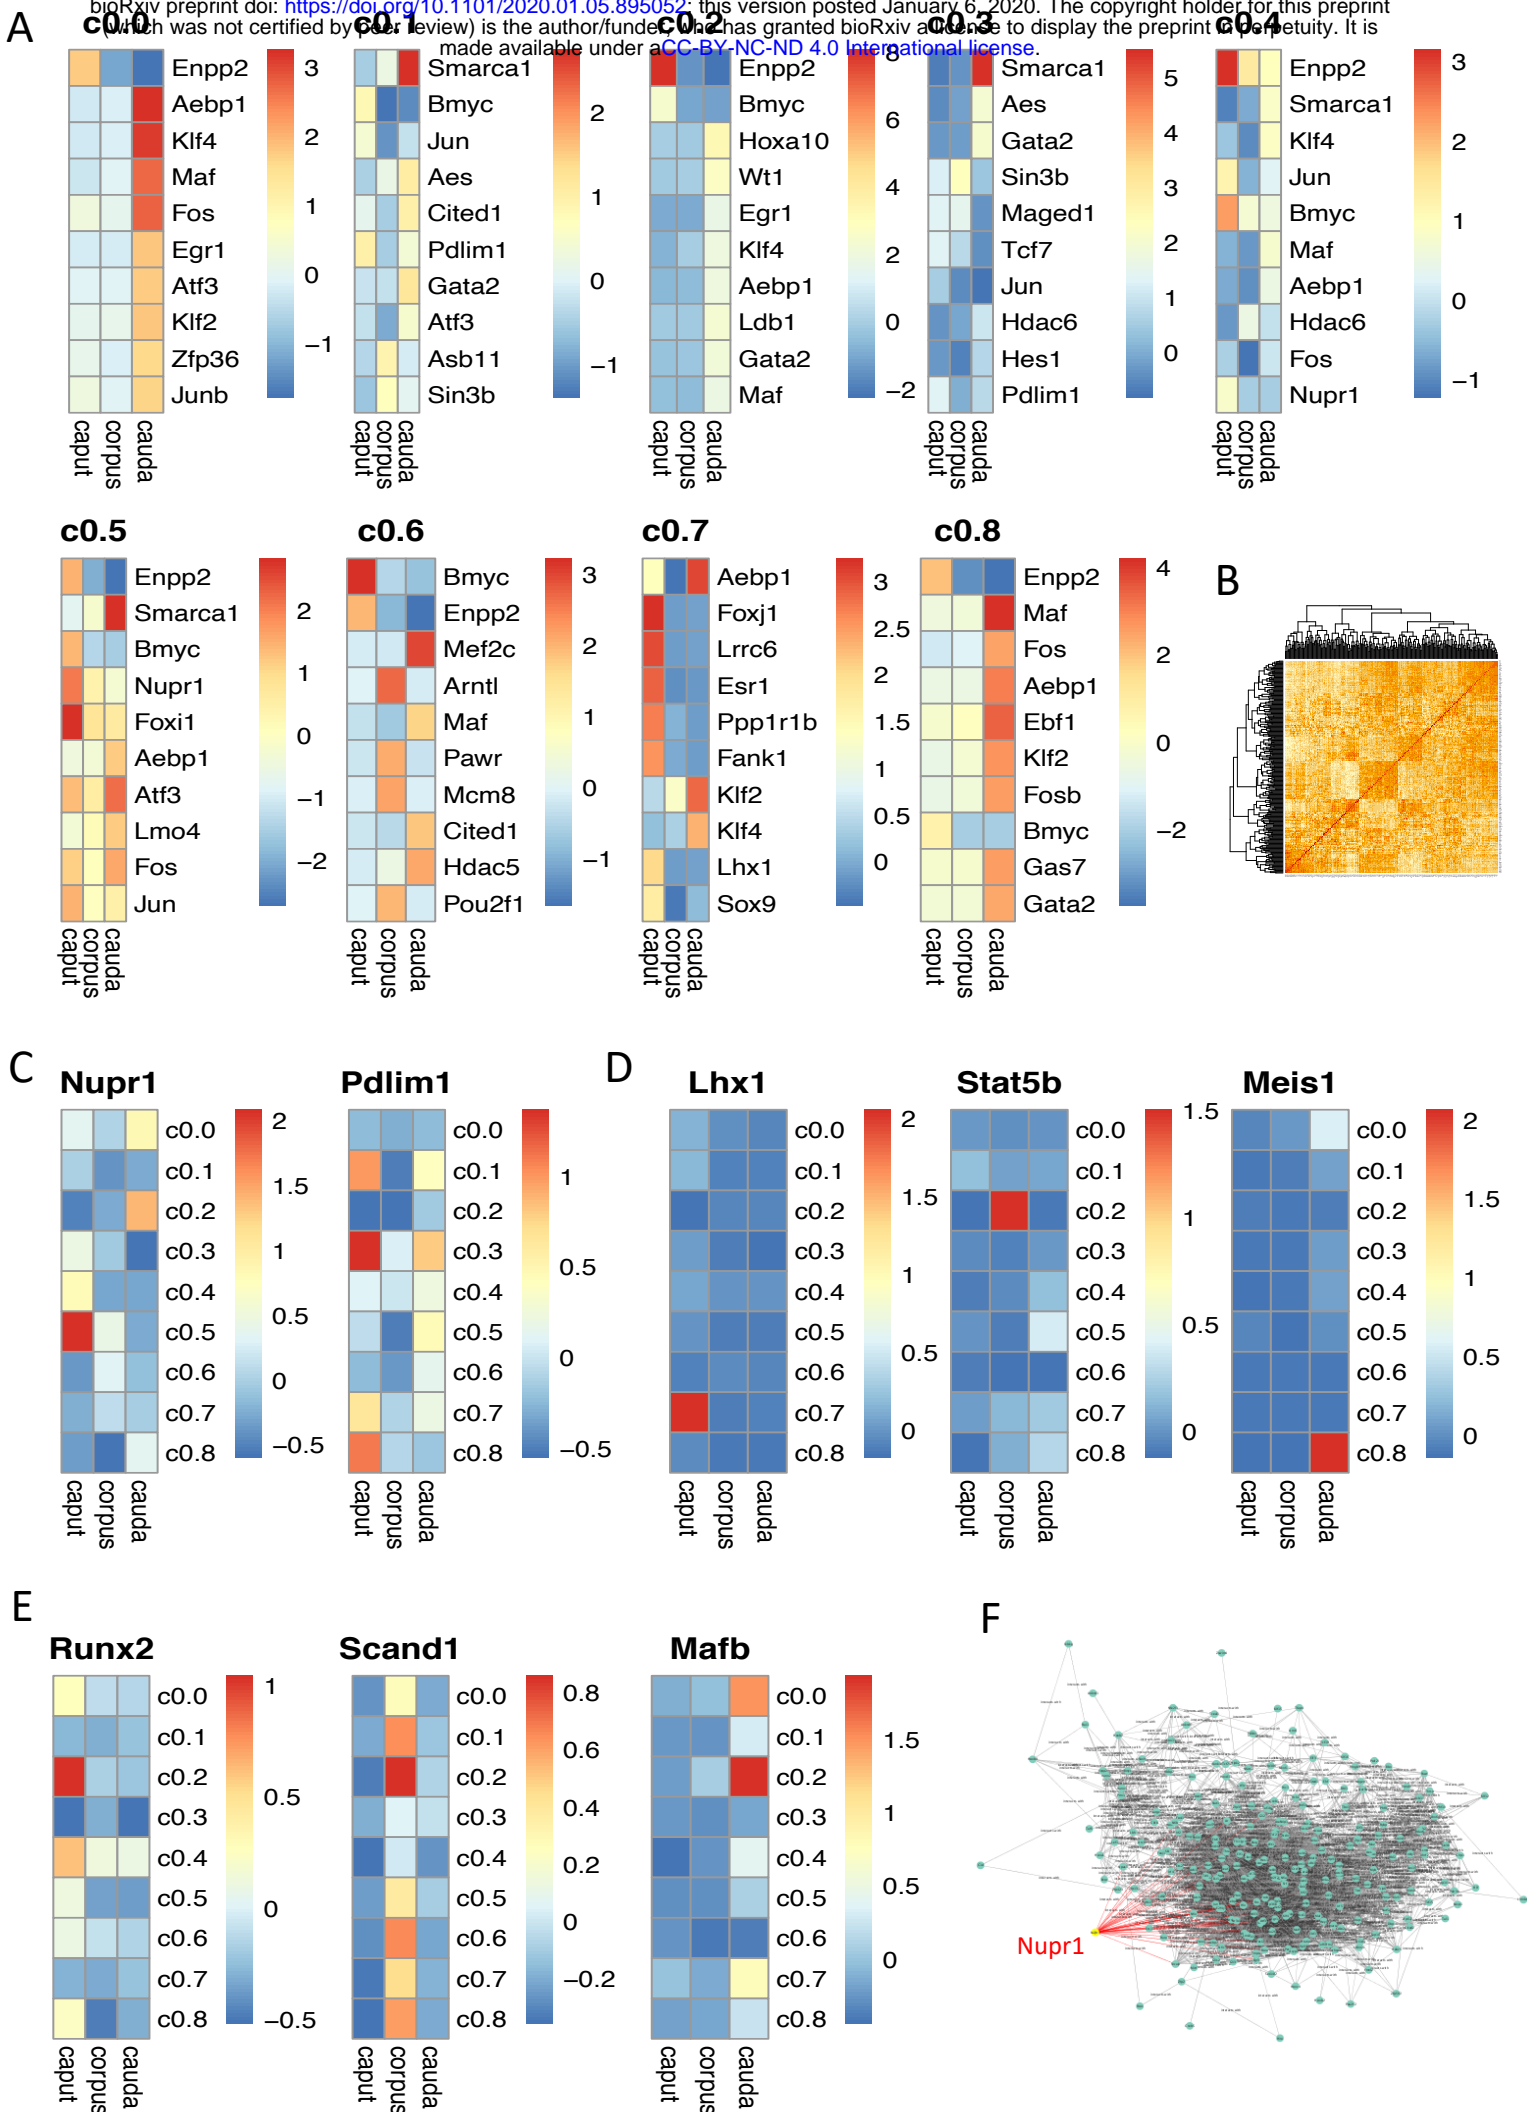

**Figure 6**
